## **Harnessing full-text publications for deep insights into *C. elegans* and *Drosophila* connectomes**

Karthick Raja ARULPRAKASAM<sup>1</sup>, Janelle Wing Shan TOH<sup>1</sup>, Mani R KUMAR<sup>1</sup>, Herman FOO<sup>1</sup>, Emilia Emmanuelle DAVEY<sup>1</sup>, Marek MUTWIL<sup>1</sup>, Guillaume THIBAULT<sup>1,2</sup>

<sup>1</sup>School of Biological Sciences, Nanyang Technological University, Singapore, 637551  
<sup>2</sup>Mechanobiology Institute, National University of Singapore, Singapore 117411

### ORCID

KRA 0000-0002-0403-2910

MM 0000-0002-7848-0126

GT 0000-0002-7926-4812

### Correspondence to:

Marek Mutwil, +65 6904 7503, email: [mutwil@ntu.edu.sg](mailto:mutwil@ntu.edu.sg)

Guillaume Thibault, +65 6592 1787, email: [thibault@ntu.edu.sg](mailto:thibault@ntu.edu.sg)

Running Title: Revolutionizing *C. elegans* and *Drosophila* Connectome Analysis

## 1 **SUMMARY**

2 In the rapidly expanding domain of scientific research, tracking and synthesizing information from the rapidly  
3 increasing volume of publications pose significant challenges. To address this, we introduce a novel high-  
4 throughput pipeline that employs ChatGPT to systematically extract and analyze connectivity information from  
5 the full-texts and abstracts of 24,237 and 150,538 research publications concerning *Caenorhabditis elegans*  
6 and *Drosophila melanogaster*, respectively. This approach has effectively identified 200,219 and 1,194,587  
7 interactions within the *C. elegans* and *Drosophila* connectomes, respectively. Utilizing Cytoscape Web, we  
8 have developed comprehensive, searchable online connectomes that link relevant keywords to their  
9 corresponding PubMed IDs, thus providing seamless access to an extensive knowledge network  
10 encompassing *C. elegans* and *Drosophila*. Our work highlights the transformative potential of integrating  
11 artificial intelligence with bioinformatics to deepen our understanding of complex biological systems. By  
12 revealing the intricate web of relationships among key entities in *C. elegans* and *Drosophila*, we offer invaluable  
13 insights that promise to propel advancements in genetics, developmental biology, neuroscience, longevity,  
14 and beyond. We also provide details and discuss significant nodes within both connectomes, including the  
15 insulin/IGF-1 signaling (IIS) and the notch pathways. Our innovative methodology sets a robust foundation for  
16 future research aimed at unravelling complex biological networks across diverse organisms.

17

18

## 19 **INTRODUCTION**

20 The landscape of biological research has experienced a significant transformation over the past two decades,  
21 marked by an exponential surge in the volume of scientific publications. This trend is particularly pronounced  
22 in the study of model organisms such as *Caenorhabditis elegans* and *Drosophila melanogaster*, which have  
23 long served as pivotal systems for understanding fundamental biological processes. A PubMed search reveals  
24 the magnitude of this surge: the number of publications related to *C. elegans* has escalated from 6,166 in 2000  
25 to over 40,000 in 2023, while *Drosophila* research has expanded from 40,793 to more than 120,000  
26 publications within the same timeframe. This proliferation of data, while testament to the fields' dynamism and  
27 the research community's productivity, presents a formidable challenge. Researchers are now faced with the  
28 Herculean task of staying abreast of emerging insights and effectively synthesizing vast amounts of  
29 information. The critical need for sophisticated tools to navigate, manage, and interpret this growing knowledge  
30 base has never been more apparent. Without such innovations, the research community's capacity to forge

31 novel connections and draw meaningful insights from the wealth of available data may be substantially  
32 hindered, potentially slowing the trajectory of scientific progress.

33

34 Existing connectome and pathway databases, such as BioGRID, the Gene Ontology (GO), and Reactome,  
35 offer valuable insights into the complex networks of gene interactions and biological pathways. BioGRID is an  
36 extensive repository for interaction datasets, facilitating the exploration of protein and genetic interactions in a  
37 variety of organisms (Stark et al., 2006). However, like many databases, it may not capture real-time research  
38 dynamics due to the inevitable delay in data curation (Oughtred et al., 2019). The Gene Ontology (GO)  
39 provides a comprehensive framework for the representation of gene function across species, yet it can be  
40 constrained by its static consensus terminology and may not capture the full spectrum of gene functionality or  
41 recent discoveries (Gaudet & Dessimoz, 2017). Reactome, while detailing pathways of numerous biological  
42 processes, could also potentially miss species-specific functions and unique cellular conditions (Milacic et al.,  
43 2024). Despite the undeniable utility of these tools, they are not without limitations. Their reliance on curated  
44 data ensures accuracy but can result in updates lagging behind the latest literature due to the labor-intensive  
45 nature of manual curation. Moreover, these databases might not fully encapsulate the multifaceted  
46 relationships between genes, such as epistatic interactions, genetic modifiers, and context-dependent effects.  
47 Such relationships are essential for a comprehensive understanding of complex phenotypes and diseases.  
48 This underscores a crucial gap: the need for an advanced tool capable of dynamically incorporating the latest  
49 findings and representing the intricate web of genetic interactions with both depth and breadth.

50

51 In the fields of *C. elegans* and *Drosophila* research, gold-standard organism-specific databases such as  
52 WormBase and FlyBase have been instrumental in collating vast amounts of genetic information (Gramates  
53 et al., 2022; Harris et al., 2010). These platforms offer insights into gene function, protein-protein interactions,  
54 and phenotypic data crucial for understanding development, aging, and disease in these model organisms.  
55 WormBase, for instance, has been a pivotal tool for *C. elegans* researchers, providing curated genetic,  
56 genomic, and biological information. Similarly, FlyBase serves the *Drosophila* community by compiling data  
57 on genetic and molecular attributes of *Drosophila* genes and genomes. However, even these comprehensive  
58 repositories may not fully capture the dynamic and rapidly evolving insights emerging from current literature.  
59 Key information on context-specific gene interactions, the influence of environmental factors on genetic  
60 pathways, and the subtleties of temporal and spatial gene expression patterns are often more thoroughly

61 detailed in individual studies. As such, there exists a gap between curated databases and the nuanced, high-  
62 resolution data that can be mined from full-text publications, which often contain rich, yet uncurated, insights  
63 into gene function and regulation.

64  
65 In this work, we unveil a high-throughput text-mining pipeline designed to systematically extract and analyze  
66 gene-related information from a vast array of research publications concerning *C. elegans* and *Drosophila*.  
67 Utilizing the capabilities of natural language processing technologies, this pipeline transcends the confines of  
68 traditional databases to offer a dynamic, enriched view of the genetic interaction landscapes of these model  
69 organisms. We detail the development and deployment of our pipeline, showcasing its unparalleled ability to  
70 uncover and visualize intricate networks of gene interactions and biological pathways. Through this effort, we  
71 aim to equip researchers with a robust tool to navigate the growing wealth of genetic and biological information  
72 in *C. elegans* and *Drosophila*, thereby catalyzing significant advances in our systemic understanding of biology.  
73 Our study underscores the feasibility and the transformative impact of integrating advanced computational  
74 methods with bioinformatics to enhance our grasp of complex biological systems. The *C. elegans* and  
75 *Drosophila* Connectomes, developed as a result of this endeavor, are accessible at  
76 <http://worm.connectome.tools> and <http://drosophila.connectome.tools>, respectively, serving as comprehensive  
77 portals to an array of interactions and pathways.

78

79

## 80 **RESULTS**

### 81 **Semantic Analysis of Thousands of Abstracts and Full-Text Papers**

82 In our comprehensive analysis, we processed a substantial amount of literature pertaining to gene function  
83 within *C. elegans* and *Drosophila*. To construct the *C. elegans* and *Drosophila* Connectomes, we  
84 systematically searched scientific research papers for occurrences of *C. elegans* or *Drosophila* genes in their  
85 titles and abstracts. We prioritized full-text papers from open-access publications, those freely available in  
86 PubMed Central (PMC), and accessible through Elsevier via the NTU Library. Alternatively, it went back to  
87 fetch only titles and abstracts if full-text unavailable. This approach ensured that the selected papers were  
88 directly relevant to the genetic makeup and biological processes of these model organisms. The result was a  
89 curated selection of articles that form the backbone of our *C. elegans* or *Drosophila* Connectomes databases.  
90 Initially, we extracted 24,237 *C. elegans*-related articles, comprising 9,904 full-text articles and 14,332  
91 abstracts. For *Drosophila*, the amount included an even larger set of 150,538 articles, with 71,226 full-text

92 articles and 79,311 abstracts. Articles were initially categorized based on gene nomenclature, which  
93 necessitated a subsequent deduplication step due to multiple occurrences of the same articles across different  
94 categories. Following this curation process, we filtered the dataset to a final tally of 12,062 articles for the *C.*  
95 *elegans* connectome and 36,372 articles for the *Drosophila* connectome. These articles span a wide  
96 distribution across 925 journals for *C. elegans* and 1,815 journals for *Drosophila* (Table S1). For a more  
97 detailed visualization, we have compiled the top 40 most frequently cited journals in both fields, demonstrating  
98 the quantitative distribution of the articles (Figures 1A and 1B). These articles form the foundation of our  
99 subsequent analysis using GPT, enabling a refined exploration of the genetic and molecular interplays that  
100 define the complex connectomes of these model organisms.

101

102 We exploited the capabilities of OpenAI's GPT API to extract functional relationships between entity pairs (e.g.,  
103 gene A interacts with gene B), infer functional annotations of genes (e.g., gene A is implicated in dauer  
104 formation), and delineate abbreviations (e.g., FOXO for FORKHEAD BOX O). To optimize our query efficiency,  
105 we iteratively tested different prompts with ChatGPT until we refined a distinct prompt (Table S2). The prompt  
106 was systematically applied across all abstracts and full-text articles, revealing 200,219 functional relationships  
107 for the *C. elegans* connectome and 1,194,587 for the *Drosophila* connectome, along with 112,128 gene  
108 function annotations and 73,591 abbreviation identifications. To evaluate the quality of GPT's output, we  
109 examined the relationships or 'edges' that it identified between two genes and/or entities within the literature  
110 network. The GPT analysis generated statements in the format of "Entity1! Relationship! Entity2". We classified  
111 edges as "good" when at least one of the entities appeared in the GPT analysis, and as "bad" when neither  
112 entity was found. For *C. elegans*, out of 334,104 total edges, 268,632 were designated as "good", while 65,472  
113 were "bad" (Figure 1C). In parallel, the *Drosophila* connectome revealed 1,498,156 edges, with 1,056,937  
114 categorized as 'good' and 441,319 as "bad" (Figure 1D). Such results lend confidence to the integrity of GPT's  
115 output, affirming that most relationships identified align with the expected analytical format. Next to evaluate  
116 the precision of our text-mining process, we conducted a manual accuracy assessment on a random sample  
117 of 50 abstracts. The outcomes indicated that GPT predominantly identified relationships correctly (Figure 2,  
118 Documents S2 and S3). However, we did observe instances where relationships were either missed or  
119 inaccurately characterized. Such inaccuracies were notably prevalent in abstracts and full-text articles that did  
120 not mention specific gene names, leading to instances of GPT "hallucinating" entities, incorrectly designating  
121 them as "gene".

## 122 **Expanding the *C. elegans* Interaction Map for a Connectome with Comprehensive Coverage**

123 Leveraging the outputs from GPT analysis, which consist of pairwise relationships between entities, we crafted  
124 a network that encapsulates the full spectrum of functional relationships within the *C. elegans* biological  
125 system. Despite GPT's instruction to prioritize genes, (Table S2) the analysis yielded interactions that included  
126 not only gene-gene interactions but also connections to biological functions, pathways, and phenotypes (Figure  
127 3). During the curation process, we encountered numerous instances where gene functions were discussed  
128 generically, using placeholders such as "gene", or the organism names "*Caenorhabditis elegans*" and "worm"  
129 were utilized as proxy for specific genetic entities. These non-specific terms were subsequently removed to  
130 sharpen the focus on the top 20 most meaningful entities within the *C. elegans* pool. The analysis spotlighted  
131 "*daf-16*" and "LIFESPAN" as the most prevalent topics in *C. elegans* literature, underscoring their significance  
132 in the field (Figure 3B). Moreover, examining the types of relationships revealed that "regulated", "requires",  
133 and "interacts with" emerged as the most common edges, delineating the primary modes of genetic and  
134 molecular interactions in *C. elegans* (Figures 3A and 3D). To understand the pattern of mostly investigated  
135 genes we pulled out the information of top 5,000 entities, edges between entities, genes as entities, and edges  
136 between genes that are appeared in both *C. elegans* and *Drosophila* connectome analysis (Table S3-S6). This  
137 analysis showed that "*lin-12*", "*let-23*", and "*par-3*" are mostly investigated genes in *C. elegans* (Figure 3C).  
138 The comparative frequency of these edges demonstrates the thematic congruencies within the biological  
139 research of these model organisms, reflecting shared foundational processes that are central to understanding  
140 their complex biology. The connectome thus constructed offers a comprehensive view of the intricate web of  
141 interactions that define *C. elegans* biology, serving as a valuable resource for researchers navigating this  
142 model organism's extensive genetic landscape.

143  
144 Further analysis was conducted to assess the comprehensiveness of the *C. elegans* Connectome in relation  
145 to the established BioGRID database, focusing on interacting edges which includes "interact", "bind", and  
146 "phosphorylate" relationships from the whole connectome database and the protein-protein interaction (PPI  
147 network) only from connectome database (Figures 3E and 3F). We identified 8,565 interacting edges in the  
148 connectome. Notably, the Connectome and BioGRID share 311 identical interacting partners. Additionally,  
149 there are 158 interactions catalogued in BioGRID that overlap with the Connectome; these, however, are not  
150 specifically defined as interacting. In terms of the PPI network, the *C. elegans* Connectome demonstrated an  
151 overlap of 298 PPI interacting edges with BioGRID, yet it also identified an additional 4,285 interacting edges

152 not catalogued by BioGRID (Figure 3F). These findings highlight the Connectome's strength in detecting not  
153 only the commonly recognized interactions but also a broader spectrum of biological relationships.  
154 Furthermore, the Connectome's capability to capture more nuanced interaction types beyond interacting—  
155 such as “colocalize with” and “inhibits”—affirms its utility in providing a more detailed and extensive mapping  
156 of molecular interactions (Figure 3).

157

158 In our comprehensive mapping of the *Drosophila* connectome, we delineated a network equally rich and  
159 intricate as its *C. elegans* counterpart. The extent of interaction types identified among *Drosophila* genes, with  
160 “regulates” and “interacts with” emerging as particularly common, indicating frequent protein-protein and gene  
161 regulatory interactions (Figure 4A). Broader biological entities and processes that are recurrently discussed,  
162 such as “apoptosis” and “lifespan”, highlight their fundamental importance in *Drosophila* studies (Figure 4B).  
163 The genes that dominate the *Drosophila* Connectome, such as “VIA”, “cycle” and “actin”, underscoring their  
164 prominence and frequent investigation within the species' genetic research (Figure 4C). It is important to note  
165 that terms like “VIA” and “cycle” cover both specific gene names and instances where these words do not refer  
166 to genes in the prompts/connectomes. Due to this, such terms cannot be distinctly identified as gene-related  
167 by ChatGPT without additional contextual analysis. Complementary , the most common gene-to-gene edges  
168 include “has”, “regulates” and other informative terms on the type of interactions such as “is required for”,  
169 illustrating the extensive interconnectivity within the *Drosophila* genome (Figure 4D). Our Connectome  
170 contained 44,382 edges categorized as “interacting” (Figure 4E). Of these, 289 were found to directly  
171 correspond with interactions listed in BioGRID. Additionally, the Connectome shared another 132 interactions  
172 with BioGRID, though these were not explicitly categorized under the “interacting” descriptor. Regarding the  
173 protein-protein interaction (PPI) network, a comparison revealed that 19 PPI edges were common between  
174 the *Drosophila* Connectome and BioGRID (Figure 4F). Nevertheless, our Connectome unveiled 9,101  
175 additional PPI edges, absent in BioGRID's catalog. Together, the analysis of both the *C. elegans* and  
176 *Drosophila* connectomes illuminates their potential to not only complement but substantially augment existing  
177 genetic databases. By unveiling a multitude of previously unavailable interactions, these connectomes serve  
178 as unconventional resources that encapsulate the evolving complexity of biological research. They provide  
179 researchers with dynamic and current tools essential for exploring into the genetic and molecular fabric of  
180 these model organisms.

181



## 182 **Interactive Connectome Platforms for *C. elegans* and *Drosophila***

183 The *C. elegans* and *Drosophila* Connectomes offer an interactive gateway to a vast array of genetic  
184 interactions, parallel to a digital atlas for biological functions within these model organisms. Through an intuitive  
185 interface, users can query genes, proteins, and other entities, obtaining detailed information pages that include  
186 GPT-generated abbreviations, functional annotations, and direct links to scientific articles. The platforms  
187 feature KnowledgeNetworks, visual representations of the connectome that allow users to customize the view,  
188 isolate nodes, and even download data for advanced analysis. A comprehensive summary accompanies each  
189 network, providing immediate insights into the most connected nodes and their respective literature sources.  
190 For those requiring programmatic access, an API delivers the connectome's array of data in a structured  
191 format. Both Connectomes have been constructed with the same dedication to accessibility and depth of  
192 information as the PlantConnectome that we recently reported (Fo et al., 2023).

193

194 In the space of model organisms, few genes have garnered as much attention as *daf-16* in *C. elegans*, a gene  
195 whose conservation extends to its *Drosophila* counterpart, the forkhead box protein O (*foxo*). These genes  
196 pivotal connections within the complex networks of *C. elegans* and *Drosophila* biology, influencing essential  
197 processes like development, aging, metabolism, and stress response. DAF-16 and FOXO, transcription factors  
198 that interact with genes containing *daf-16*/FOXO binding elements (DBE), play crucial roles in the Insulin/IGF-  
199 1-like signaling (IIS) pathway. A query for "*daf-16*" and "*foxo*" within the *C. elegans* and *Drosophila*  
200 Connectomes maps a network sourced from 514 and 213 papers, respectively. Refinement of the search to  
201 "regulates" within the "Layout Options" reveals a more focused network from 61 and 71 papers for *C. elegans*  
202 and *Drosophila* (Figures 5A and 5B), respectively, featuring *daf-16* and *foxo*'s roles in regulating lifespan,  
203 feeding behaviors, dauer development, and stress resistance among other processes.

204

205 The *C. elegans* Connectome elucidates *daf-16*'s regulation of genes such as "CYP-35B1/DOD-13" (Iser et al.,  
206 2011), "SCL-1" (Ookuma, Fukuda & Nishida, 2003), "PAK-1" (Kennedy, Pham & Grishok, 2013), "COL-  
207 19P::GFP" (Wirick et al., 2021), and "SRH-234" (Gruner et al., 2014). Similarly, it highlights how *daf-16* and  
208 *foxo* regulate specific phenotypes in *C. elegans* and *Drosophila*, such as "FATTY ACID LIPOLYSIS" (Antebi,  
209 2013) or "LIPOLYSIS IN FAT BODY CELLS" (Roy & Palli, 2018) and "L1 ARREST, DAUER DEVELOPMENT,  
210 AND AGING" (Kaplan & Baugh, 2016) or "STEM CELL AGING" (Artoni et al., 2017). These connections and



211 their respective publications are directly accessible through one-click links, demonstrating the tool's efficacy in  
212 providing a rapid, comprehensive overview of protein interactions.

213

214 The highly conserved Notch signaling pathway, pivotal in cell fate determinations, was initially discovered in  
215 *Drosophila*, marked by its role in wing morphology. Subsequently, the *C. elegans* counterparts, *lin-12* and *glp-*  
216 *1*, were identified, spotlighting their essential functions in developmental processes (Priess, Schnabel &  
217 Schnabel, 1987; Greenwald, Sternberg & Horvitz, 1983; Austin & Kimble, 1987). This pathway plays a crucial  
218 role in a multitude of biological processes (Kopan & Ilgan, 2009; Suarez Rodriguez, Sanlidag & Sahlgren,  
219 2023), operating through cell-cell interactions initiated by transmembrane ligands that activate Notch receptors  
220 on adjacent cells. The activation leads to the cleavage of the Notch receptor's cytosolic domain, which then  
221 moves to the nucleus to regulate gene expression.

222

223 Leveraging the “notch” query within both the *C. elegans* and *Drosophila* Connectomes yielded networks  
224 sourced from 225 and 684 papers, respectively. Further refinement using “regulates” or “interacts with” in the  
225 “Layout Options” revealed more focused networks, sourced from 30 and 116 papers for *C. elegans* and  
226 *Drosophila*, respectively (Figures 5C and 5D). This analysis underscored the Notch pathway's regulation of  
227 “LIN-11 EXPRESSION (Marri & Gupta, 2009), “GERM CELL FATE SPECIFICATION” (Lee et al., 2016), and  
228 “C.ELEGANS BEHAVIOR” (Chao et al., 2005) in *C. elegans*. In contrast, the *Drosophila* Connectome  
229 illustrated a richer interaction network for the Notch pathway, indicating a more extensive exploration of its  
230 interacting partners in *Drosophila* or its suitability as a model organism for studying these interactions. Among  
231 the highlighted interactions were “NOTCH” interacts with “MKK4” (Zhou et al., 2021), “DMYC EXPRESSION”  
232 (Sun et al., 2008), “MORE THAN 300 GENES” (Ho, Pallavi & Artavanis-Tsakonas, 2015), and “AKAP200”  
233 (Bala Tannan et al., 2018), showcasing the pathway's broad influence across *Drosophila*'s genetic landscape.

234

235

## 236 **DISCUSSION**

237 In this study, we unveiled the comprehensive Connectomes for *C. elegans* and *Drosophila*, charting a vast  
238 landscape of genetic interactions and biological functions pivotal to these model organisms. Our analysis,  
239 underpinned by the innovative application of GPT technology, has facilitated the identification and cataloging  
240 of hundreds of thousands of genetic relationships, encompassing both well-documented and previously

241 unexplored interactions. Notably, genes such as *daf-16/foxo* in *C. elegans* and its functional counterpart in  
242 *Drosophila*, alongside the Notch signaling pathway, emerged as significant nodes within these networks.  
243 These hubs not only underscore the genetic complexity inherent in biological processes like development,  
244 aging, and stress response but also highlight the Connectomes' capacity to unearth interactions that span  
245 across a broad spectrum of biological research. The creation of these Connectomes marks a significant stride  
246 in our ability to navigate the genetic intricacies of *C. elegans* and *Drosophila*, offering an enriched resource  
247 that advances our comprehension of their genetic frameworks and sets the stage for future discoveries in  
248 genetic regulation and function.

249  
250 The introduction of our *C. elegans* and *Drosophila* Connectomes represents a significant augmentation to  
251 databases like BioGRID, which catalogs nearly 1.6 million interactions across various species through detailed  
252 literature annotations (Stark et al., 2006; Oughtred et al., 2019). Our connectomes, by mining full-text  
253 publications via computational techniques, offer a complementary approach. This methodology not only  
254 enriches the database with the latest research findings but also unravels biological contexts and intricate  
255 details of interactions, facilitating a more nuanced understanding of genetic networks. While BioGRID's manual  
256 curation process ensures the accuracy and reliability of its data (Oughtred et al., 2019), it may encounter  
257 challenges in rapidly integrating new discoveries. Our connectomes aim to mitigate this gap, leveraging natural  
258 language processing technologies to capture and incorporate emerging insights directly from the expansive  
259 volume of research articles. However, it's essential to recognize the foundational role of databases in the  
260 bioinformatics field. Their rigorously vetted information provides a valuable cornerstone that our computational  
261 approach seeks to extend, not supplant. The inclusion of CRISPR screen datasets into BioGRID signifies a  
262 notable expansion in the types of data curated, reflecting an evolution that our connectomes parallel through  
263 the adoption of advanced data mining techniques (Salwinski et al., 2009; Murugesan, Abdulkadhar &  
264 Natarajan, 2017). By integrating the strengths of manual curation with the scalability of automated text-mining,  
265 we aspire to create a synergistic resource. This combined approach aims to offer researchers a rounded view  
266 of the biological landscape, enabling a deeper understanding and facilitating discoveries in the genetics of *C.*  
267 *elegans* and *Drosophila*.

268  
269 In constructing our *C. elegans* and *Drosophila* Connectomes, we aimed to address some of the challenges  
270 inherent in manual curation processes. Our strategy prioritized articles accessible at no cost, including open-

271 access publications and those available through PubMed Central (PMC) and Elsevier via the NTU Library.  
272 While this approach has allowed us to compile a vast and comprehensive database, it inherently limits our  
273 ability to immediately incorporate the latest research findings beyond titles and abstracts. This delay in  
274 integrating new studies poses a challenge in maintaining the most current view of complex biological networks.  
275 Recognizing this limitation, we are exploring innovative strategies to further enhance the timeliness and  
276 comprehensiveness of our database. Future directions could include forming collaborations with publishers to  
277 secure earlier access to research findings and developing automated text-mining tools that can more rapidly  
278 identify and incorporate relevant studies. By augmenting our current resources with these advanced  
279 methodologies, we will aim to minimize delays and ensure our databases remain at the forefront of biological  
280 research. These steps should not only improve the immediacy of data curation but also reinforce our  
281 commitment to providing a dynamic and cutting-edge resource for the scientific community.

282

283 In conclusion, the advent of the *C. elegans* and *Drosophila* Connectomes represents an advancement in the  
284 field of biological databases, transcending traditional limitations through computational mining and dynamic  
285 data incorporation. By leveraging full-text publications, these connectomes offer an enriched, contextually  
286 detailed exploration of biological interactions, including both the depth and breadth necessary for decoding  
287 complex biological systems. They are not just repositories of information but active platforms for discovery,  
288 enabling insights into the intricate interplay of genes and pathways. Moving forward, our focus should remain  
289 on expanding accessibility and enhancing data comprehensiveness, ensuring that the *C. elegans* and  
290 *Drosophila* Connectomes continue to evolve as indispensable resources in the quest to unravel the  
291 complexities of life's fundamental processes.

292

### 293 **LIMITATION OF THE STUDY**

294 While our approach significantly advances the scope of interaction data available by leveraging computational  
295 techniques to mine full-text publications, it is dependent upon the accessibility of these publications. Reliance  
296 on publicly accessible or institutionally available literature means that some recent studies, especially those  
297 behind paywalls or subject to embargo periods, may not be immediately integrated into our database. This  
298 could introduce delays in reflecting the most current research findings and innovations within the connectomes.  
299 Furthermore, while automated data extraction techniques offer scalability, they may not always achieve the  
300 accuracy of manual curation, potentially affecting the precision of interaction data. Efforts are ongoing to refine

301 these methodologies and expand our access to the latest scientific publications, ensuring our databases not  
302 only grow in volume but also in the quality and timeliness of the information they provide. Future directions will  
303 include exploring collaborations for wider access to publications and enhancing our algorithms for data mining  
304 to mitigate these limitations, continually striving to present the most accurate and comprehensive view of the  
305 biological landscapes we aim to model.

306

307

## 308 **METHODS**

### 309 **KEY RESOURCES TABLE**

| REAGENT OR RESOURCE     | SOURCE                                                                                    | IDENTIFIER                                                                                          |
|-------------------------|-------------------------------------------------------------------------------------------|-----------------------------------------------------------------------------------------------------|
| Deposited Data          |                                                                                           |                                                                                                     |
| Custom codes            | GitHub                                                                                    | <a href="https://github.com/mutwil/plant_connectome">https://github.com/mutwil/plant_connectome</a> |
| Software and Algorithms |                                                                                           |                                                                                                     |
| BioPython 1.81          | <a href="https://biopython.org/">https://biopython.org/</a>                               | Cock <i>et al.</i> (Cock <i>et al.</i> , 2009)                                                      |
| ChartJs 4.4.1           | <a href="https://www.chartjs.org/docs/master">https://www.chartjs.org/docs/master</a>     | n/a                                                                                                 |
| Cytoscape.js 3.27       | <a href="https://js.cytoscape.org">https://js.cytoscape.org</a>                           | Frank <i>et al.</i> (Franz <i>et al.</i> , 2016)                                                    |
| FileSaver 2.0.5         | GitHub                                                                                    | <a href="https://github.com/eligrey/FileSaver.js">https://github.com/eligrey/FileSaver.js</a>       |
| GPT davinci-002         | Open AI                                                                                   | <a href="https://platform.openai.com">https://platform.openai.com</a>                               |
| jQuery 3.7.1            | <a href="https://jquery.com">https://jquery.com</a>                                       | n/a                                                                                                 |
| json 2.6.3              | PyPI                                                                                      | <a href="https://pypi.org">https://pypi.org</a>                                                     |
| NetworkX 3.2            | <a href="https://pypi.org/project/networkx/3.1">https://pypi.org/project/networkx/3.1</a> | Hagberg <i>et al.</i> (Hagberg, Swart & Schult, 2008)                                               |
| pickle5 0.0.12          | PyPI                                                                                      | <a href="https://pypi.org">https://pypi.org</a>                                                     |
| Python 3.9.15           | Python Software Foundation                                                                | <a href="https://python.org">https://python.org</a>                                                 |
| regex 2023.6.3          | PyPI                                                                                      | <a href="https://pypi.org">https://pypi.org</a>                                                     |

310

## 311 **RESOURCE AVAILABILITY**

### 312 **Lead Contact**

313 Further information and requests for resources should be directed to and will be fulfilled by the lead contacts,  
314 Marek Mutwil, at [mutwil@ntu.edu.sg](mailto:mutwil@ntu.edu.sg) and Guillaume Thibault, at [thibault@ntu.edu.sg](mailto:thibault@ntu.edu.sg).

315

### 316 **Material Availability**

317 This study did not generate new reagents.

318

## 319 **Data and Code Availability**

320 The custom codes to generate the connectomes is available at GitHub  
321 ([https://github.com/mutwil/plant\\_connectome](https://github.com/mutwil/plant_connectome)).

322

## 323 **METHOD DETAILS**

### 324 **Retrieval of full-text papers**

325 Using BioPython version 1.81, we downloaded all full-text articles freely available in PubMed. This was  
326 followed by the acquisition of institutional token access to Elsevier (NTU Library) and by downloading open-  
327 access full-texts. Additionally, we included abstracts from PubMed to ensure a robust dataset. The full-texts  
328 included titles, abstracts, introductions, results, and discussions. For analysis, each article was processed  
329 using OpenAI's Python API for the davinci 3.5 model, guided by specifically crafted prompts (Table S2). The  
330 output underwent further refinement to eliminate single-letter entities (e.g., removing 'Gene !affects! X') and to  
331 reframe passive edges into active ones (e.g., converting 'daf-16 ! can restore ! Secretory protein metabolism'  
332 to 'daf-16 ! restores ! Secretory protein metabolism'). Furthermore, edges with synonymous meanings were  
333 consolidated to enhance clarity and consistency. The model operated under default settings, with the exception  
334 of setting the temperature parameter to zero, promoting deterministic outcomes. In our final tally, a total of  
335 24,237 articles for the *C. elegans* connectome and 36,372 articles for the *Drosophila* connectome were  
336 processed, encompassing both full-texts and abstracts. This comprehensive collection was assembled and  
337 analyzed within a span of two weeks, as outlined in the supplementary abstract.

338

### 339 **Construction of *C. elegans* and *Drosophila* Connectome databases**

340 Both connectomes are hosted on a Google Cloud server. The backend was implemented using the Python  
341 framework Flask and the Python packages networkx version 3.1, pickle version pickle5 0.0.12, json version  
342 2.6.3, and regex version 2023.6.3. We used JavaScript dependencies jQuery v3.7.1, Cytoscape.js v3.27,  
343 ChartJS v4.4.1, and FileSaver v2.0.5 to visualize the KnowledgeNetwork graphs.

344

### 345 **API for *C. elegans* and *Drosophila* Connectomes**

346 *C. elegans* and *Drosophila* Connectomes are equipped with an Application Programming Interface to ease  
347 conducting search queries remotely by users. For each successful call to Connectome's API, a JSON object  
348 is returned, containing the functional abbreviations, GO terms, other nodes, and text summaries associated

349 with the search query. To perform searches using the API, users can add “/api/<search type>/<search query>”  
350 to the web address, where “<search type>” and “<search query>” are placeholders representing the type of  
351 search and user’s query, respectively.

352

353

## 354 **ACKNOWLEDGEMENTS**

355 We thank members of Thibault lab for critical reading of the manuscript. This work was supported by funds  
356 from the Singapore Ministry of Education Academic Research Fund Tier 1 (RG96/22 to G.T.) and Tier 3  
357 (MOET32022-0002 to M.M.) as well as the Research Scholarship to K.R.A [predoctoral fellowship from  
358 Singapore Ministry of Education Academic Research Fund Tier 3 (MOE-MOET32020-0001)].

359

## 360 **Author contributions**

361 Conceptualization: M.M. and G.T.; Methodology: M.M. and G.T.; Formal analysis: K.R.A. and J.W.S.T.;  
362 Investigation: K.R.A., J.W.S.T., and M.R.K.; Writing - original draft: G.T. and K.R.A.; Writing - review & editing:  
363 K.R.A., M.M., and G.T.; Supervision: E.E.D., M.M. and G.T.; Project administration: M.M. and G.T.; Funding  
364 acquisition: M.M. and G.T.

365

## 366 **DECLARATION OF INTERESTS**

367 The authors declare no competing financial interests.

368

## 369 **ADDITIONAL FILES**

370 **Table S1, Related to Figure 1.** List of journals curated for the *C. elegans* and *Drosophila* Connectome. Excel  
371 Spreadsheet.

372 **Table S2, Related to Figure 2.** An example of an abstract, prompts and outputs from GPT.

373 **Table S3, Related to Figures 3A and 4A.** List of the top 5,000 most frequent edges for the *C. elegans* and  
374 *Drosophila* Connectome. Excel Spreadsheet.

375 **Table S4, Related to Figures 3B and 4B.** List of the top 5,000 most frequent entities for the *C. elegans* and  
376 *Drosophila* Connectome. Excel Spreadsheet.

377 **Table S5, Related to Figures 3C and 4C.** List of the top 5,000 most frequent genes as entities for the *C.*  
378 *elegans* and *Drosophila* Connectome. Excel Spreadsheet.

379 **Table S6, Related to Figures 3D and 4D.** List of the top 5,000 most frequent edges between genes for the  
380 *C. elegans* and *Drosophila* Connectome. Excel Spreadsheet.

381 **Document S1.** Supplementary File 1.

382 **Document S2.** Manual accuracy assessment on a random sample of 50 abstracts for the *C. elegans*  
383 Connectome.

384 **Document S3.** Manual accuracy assessment on a random sample of 50 abstracts for the *Drosophila*  
385 Connectome.

386

387

## 388 REFERENCES

389 Antebi, A. (2013) Regulation of longevity by the reproductive system. *Experimental Gerontology*. 48 (7), 596–  
390 602. doi:10.1016/j.exger.2012.09.009.

391 Artoni, F., Kreipke, R.E., Palmeira, O., Dixon, C., Goldberg, Z. & Ruohola-Baker, H. (2017) Loss of foxo  
392 rescues stem cell aging in *Drosophila* germ line. *eLife*. 6, e27842. doi:10.7554/eLife.27842.

393 Austin, J. & Kimble, J. (1987) glp-1 is required in the germ line for regulation of the decision between mitosis  
394 and meiosis in *C. elegans*. *Cell*. 51 (4), 589–599. doi:10.1016/0092-8674(87)90128-0.

395 Bala Tannan, N., Collu, G., Humphries, A.C., Serysheva, E., Weber, U. & Mlodzik, M. (2018) AKAP200  
396 promotes Notch stability by protecting it from Cbl/lysosome-mediated degradation in *Drosophila melanogaster*.  
397 *PLoS genetics*. 14 (1), e1007153. doi:10.1371/journal.pgen.1007153.

398 Chao, M.Y., Larkins-Ford, J., Tucey, T.M. & Hart, A.C. (2005) lin-12 Notch functions in the adult nervous  
399 system of *C. elegans*. *BMC neuroscience*. 6, 45. doi:10.1186/1471-2202-6-45.

400 Cock, P.J.A., Antao, T., Chang, J.T., Chapman, B.A., Cox, C.J., Dalke, A., Friedberg, I., Hamelryck, T., Kauff,  
401 F., Wilczynski, B. & de Hoon, M.J.L. (2009) Biopython: freely available Python tools for computational  
402 molecular biology and bioinformatics. *Bioinformatics*. 25 (11), 1422–1423. doi:10.1093/bioinformatics/btp163.

403 Fo, K., Chuah, Y.S., Foo, H., Davey, E.E., Fullwood, M., Thibault, G. & Mutwil, M. (2023) *PlantConnectome*:  
404 *knowledge networks encompassing >100,000 plant article abstracts*.p.2023.07.11.548541.  
405 doi:10.1101/2023.07.11.548541.

406 Franz, M., Lopes, C.T., Huck, G., Dong, Y., Sumer, O. & Bader, G.D. (2016) Cytoscape.js: a graph theory  
407 library for visualisation and analysis. *Bioinformatics*. 32 (2), 309–311. doi:10.1093/bioinformatics/btv557.

408 Gaudet, P. & Dessimoz, C. (2017) Gene Ontology: Pitfalls, Biases, and Remedies. In: C. Dessimoz & N.  
409 Škunca (eds.). *The Gene Ontology Handbook*. Methods in Molecular Biology. New York, NY, Springer. pp.  
410 189–205. doi:10.1007/978-1-4939-3743-1\_14.

411 Gramates, L.S., Agapite, J., Attrill, H., Calvi, B.R., Crosby, M.A., Dos Santos, G., Goodman, J.L., Goutte-  
412 Gattat, D., Jenkins, V.K., Kaufman, T., Larkin, A., Matthews, B.B., Millburn, G., Strelets, V.B., & the FlyBase  
413 Consortium (2022) FlyBase: a guided tour of highlighted features. *Genetics*. 220 (4), iyac035.  
414 doi:10.1093/genetics/iyac035.

415 Greenwald, I.S., Sternberg, P.W. & Horvitz, H.R. (1983) The lin-12 locus specifies cell fates in *Caenorhabditis*  
416 *elegans*. *Cell*. 34 (2), 435–444. doi:10.1016/0092-8674(83)90377-x.

417 Gruner, M., Nelson, D., Winbush, A., Hintz, R., Ryu, L., Chung, S.H., Kim, K., Gabel, C.V. & van der Linden,  
418 A.M. (2014) Feeding state, insulin and NPR-1 modulate chemoreceptor gene expression via integration of  
419 sensory and circuit inputs. *PLoS genetics*. 10 (10), e1004707. doi:10.1371/journal.pgen.1004707.

420 Hagberg, A., Swart, P.J. & Schult, D.A. (2008) *Exploring network structure, dynamics, and function using*  
421 *NetworkX*. <https://www.osti.gov/biblio/960616>.



- 422 Harris, T.W., Antoshechkin, I., Bieri, T., Blasiar, D., Chan, J., et al. (2010) WormBase: a comprehensive  
423 resource for nematode research. *Nucleic Acids Research*. 38 (Database issue), D463-467.  
424 doi:10.1093/nar/gkp952.
- 425 Ho, D.M., Pallavi, S.K. & Artavanis-Tsakonas, S. (2015) The Notch-mediated hyperplasia circuitry in  
426 *Drosophila* reveals a Src-JNK signaling axis. *eLife*. 4, e05996. doi:10.7554/eLife.05996.
- 427 Iser, W.B., Wilson, M.A., Wood, W.H., Becker, K. & Wolkow, C.A. (2011) Co-regulation of the DAF-16 target  
428 gene, *cyp-35B1/dod-13*, by HSF-1 in *C. elegans* dauer larvae and *daf-2* insulin pathway mutants. *PLoS One*.  
429 6 (3), e17369. doi:10.1371/journal.pone.0017369.
- 430 Kaplan, R.E.W. & Baugh, L.R. (2016) L1 arrest, *daf-16/FoxO* and nonautonomous control of post-embryonic  
431 development. *Worm*. 5 (2), e1175196. doi:10.1080/21624054.2016.1175196.
- 432 Kennedy, L.M., Pham, S.C.D.L. & Grishok, A. (2013) Nonautonomous regulation of neuronal migration by  
433 insulin signaling, DAF-16/FOXO, and PAK-1. *Cell Reports*. 4 (5), 996–1009. doi:10.1016/j.celrep.2013.07.045.
- 434 Kopan, R. & Ilagan, M.X.G. (2009) The Canonical Notch Signaling Pathway: Unfolding the Activation  
435 Mechanism. *Cell*. 137 (2), 216–233. doi:10.1016/j.cell.2009.03.045.
- 436 Lee, M.-H., Mamillapalli, S.S., Keiper, B.D. & Cha, D.S. (2016) A systematic mRNA control mechanism for  
437 germline stem cell homeostasis and cell fate specification. *BMB reports*. 49 (2), 93–98.  
438 doi:10.5483/bmbrep.2016.49.2.135.
- 439 Marri, S. & Gupta, B.P. (2009) Dissection of *lin-11* enhancer regions in *Caenorhabditis elegans* and other  
440 nematodes. *Developmental Biology*. 325 (2), 402–411. doi:10.1016/j.ydbio.2008.09.026.
- 441 Milacic, M., Beavers, D., Conley, P., Gong, C., Gillespie, M., et al. (2024) The Reactome Pathway  
442 Knowledgebase 2024. *Nucleic Acids Research*. 52 (D1), D672–D678. doi:10.1093/nar/gkad1025.
- 443 Murugesan, G., Abdulkadhar, S. & Natarajan, J. (2017) Distributed smoothed tree kernel for protein-protein  
444 interaction extraction from the biomedical literature. *PLoS One*. 12 (11), e0187379.  
445 doi:10.1371/journal.pone.0187379.
- 446 Ookuma, S., Fukuda, M. & Nishida, E. (2003) Identification of a DAF-16 transcriptional target gene, *scl-1*, that  
447 regulates longevity and stress resistance in *Caenorhabditis elegans*. *Current biology: CB*. 13 (5), 427–431.  
448 doi:10.1016/s0960-9822(03)00108-8.
- 449 Oughtred, R., Stark, C., Breitkreutz, B.-J., Rust, J., Boucher, L., Chang, C., Kolas, N., O'Donnell, L., Leung,  
450 G., McAdam, R., Zhang, F., Dolma, S., Willems, A., Coulombe-Huntington, J., Chatr-Aryamontri, A., Dolinski,  
451 K. & Tyers, M. (2019) The BioGRID interaction database: 2019 update. *Nucleic Acids Research*. 47 (D1),  
452 D529–D541. doi:10.1093/nar/gky1079.
- 453 Priess, J.R., Schnabel, H. & Schnabel, R. (1987) The *glp-1* locus and cellular interactions in early *C. elegans*  
454 embryos. *Cell*. 51 (4), 601–611. doi:10.1016/0092-8674(87)90129-2.
- 455 Roy, A. & Palli, S.R. (2018) Epigenetic modifications acetylation and deacetylation play important roles in  
456 juvenile hormone action. *BMC genomics*. 19 (1), 934. doi:10.1186/s12864-018-5323-4.
- 457 Salwinski, L., Licata, L., Winter, A., Thorneycroft, D., Khadake, J., Ceol, A., Aryamontri, A.C., Oughtred, R.,  
458 Livstone, M., Boucher, L., Botstein, D., Dolinski, K., Berardini, T., Huala, E., Tyers, M., Eisenberg, D., Cesareni,  
459 G. & Hermjakob, H. (2009) Recurated protein interaction datasets. *Nature Methods*. 6 (12), 860–861.  
460 doi:10.1038/nmeth1209-860.
- 461 Stark, C., Breitkreutz, B.-J., Reguly, T., Boucher, L., Breitkreutz, A. & Tyers, M. (2006) BioGRID: a general  
462 repository for interaction datasets. *Nucleic Acids Research*. 34 (Database issue), D535-539.  
463 doi:10.1093/nar/gkj109.
- 464 Suarez Rodriguez, F., Sanlidag, S. & Sahlgren, C. (2023) Mechanical regulation of the Notch signaling  
465 pathway. *Current Opinion in Cell Biology*. 85, 102244. doi:10.1016/j.ccb.2023.102244.
- 466 Sun, J., Smith, L., Armento, A. & Deng, W.-M. (2008) Regulation of the endocycle/gene amplification switch  
467 by Notch and ecdysone signaling. *The Journal of Cell Biology*. 182 (5), 885–896. doi:10.1083/jcb.200802084.
- 468 Wirick, M.J., Cale, A.R., Smith, I.T., Alessi, A.F., Starostik, M.R., Cuko, L., Lalk, K., Schmidt, M.N., Olson, B.S.,  
469 Salomon, P.M., Santos, A., Schmitter-Sánchez, A., Galagali, H., Ranke, K.J., Wolbert, P.A., Knoblock, M.L.,  
470 Kim, J.K. & Karp, X. (2021) *daf-16/FOXO* blocks adult cell fate in *Caenorhabditis elegans* dauer larvae via *lin-41/TRIM71*. *PLoS genetics*. 17 (11), e1009881. doi:10.1371/journal.pgen.1009881.

472 Zhou, D., Stobdan, T., Visk, D., Xue, J. & Haddad, G.G. (2021) Genetic interactions regulate hypoxia tolerance  
473 conferred by activating Notch in excitatory amino acid transporter 1-positive glial cells in *Drosophila*  
474 *melanogaster*. *G3 (Bethesda, Md.)*. 11 (2), jkab038. doi:10.1093/g3journal/jkab038.

475 **FIGURES AND LEGENDS**

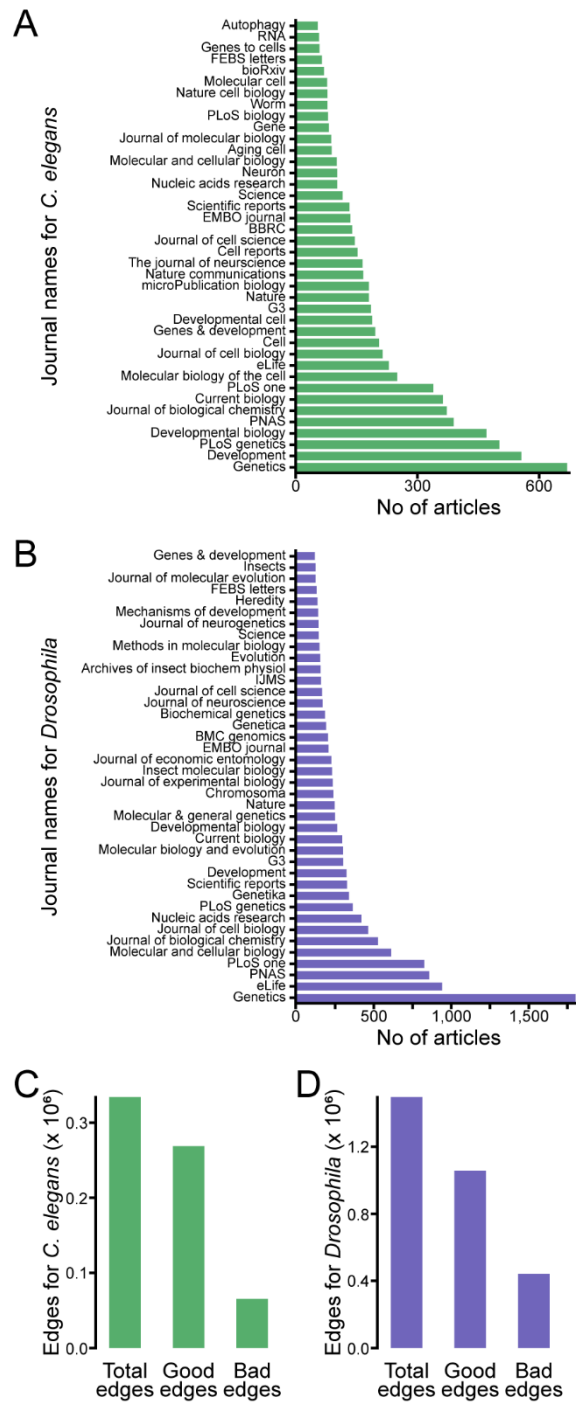

476  
477

478 **Figure 1. Comprehensive meta-analysis of full-text articles in *C. elegans* and *Drosophila***  
 479 (A-B) Quantitative distribution of articles from the top 40 journals featuring *C. elegans*- (A) and *Drosophila*-  
 480 related (B) research.  
 481 (C-D) Profile of *C. elegans* (C) and *Drosophila* (D) interaction data showing total, validated (good), and  
 482 erroneous (bad) edges (in millions).

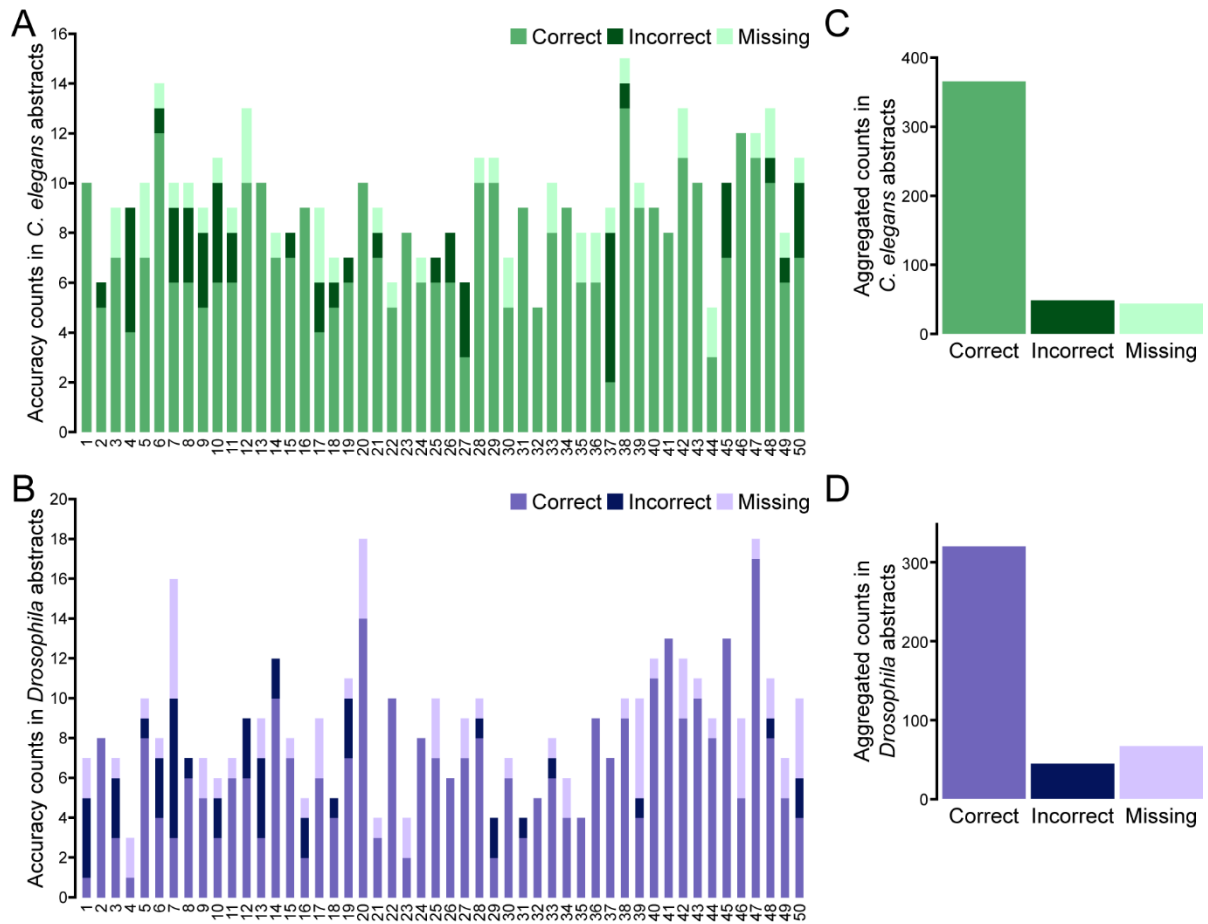

483  
484  
485  
486  
487  
488  
489

**Figure 2. Accuracy assessment of GPT-processed abstracts for model organisms**

(A-B) Analysis accuracy for 50 *C. elegans* (A) and 50 *Drosophila* (B) abstracts, categorized by the incidence of correct, incorrect, and missing information.

(C-D) Aggregated counts of accurate (correct), erroneous (incorrect), and overlooked (missing) statements from *C. elegans* (C) and *Drosophila* (D) abstracts shown in (A) and (B), respectively.

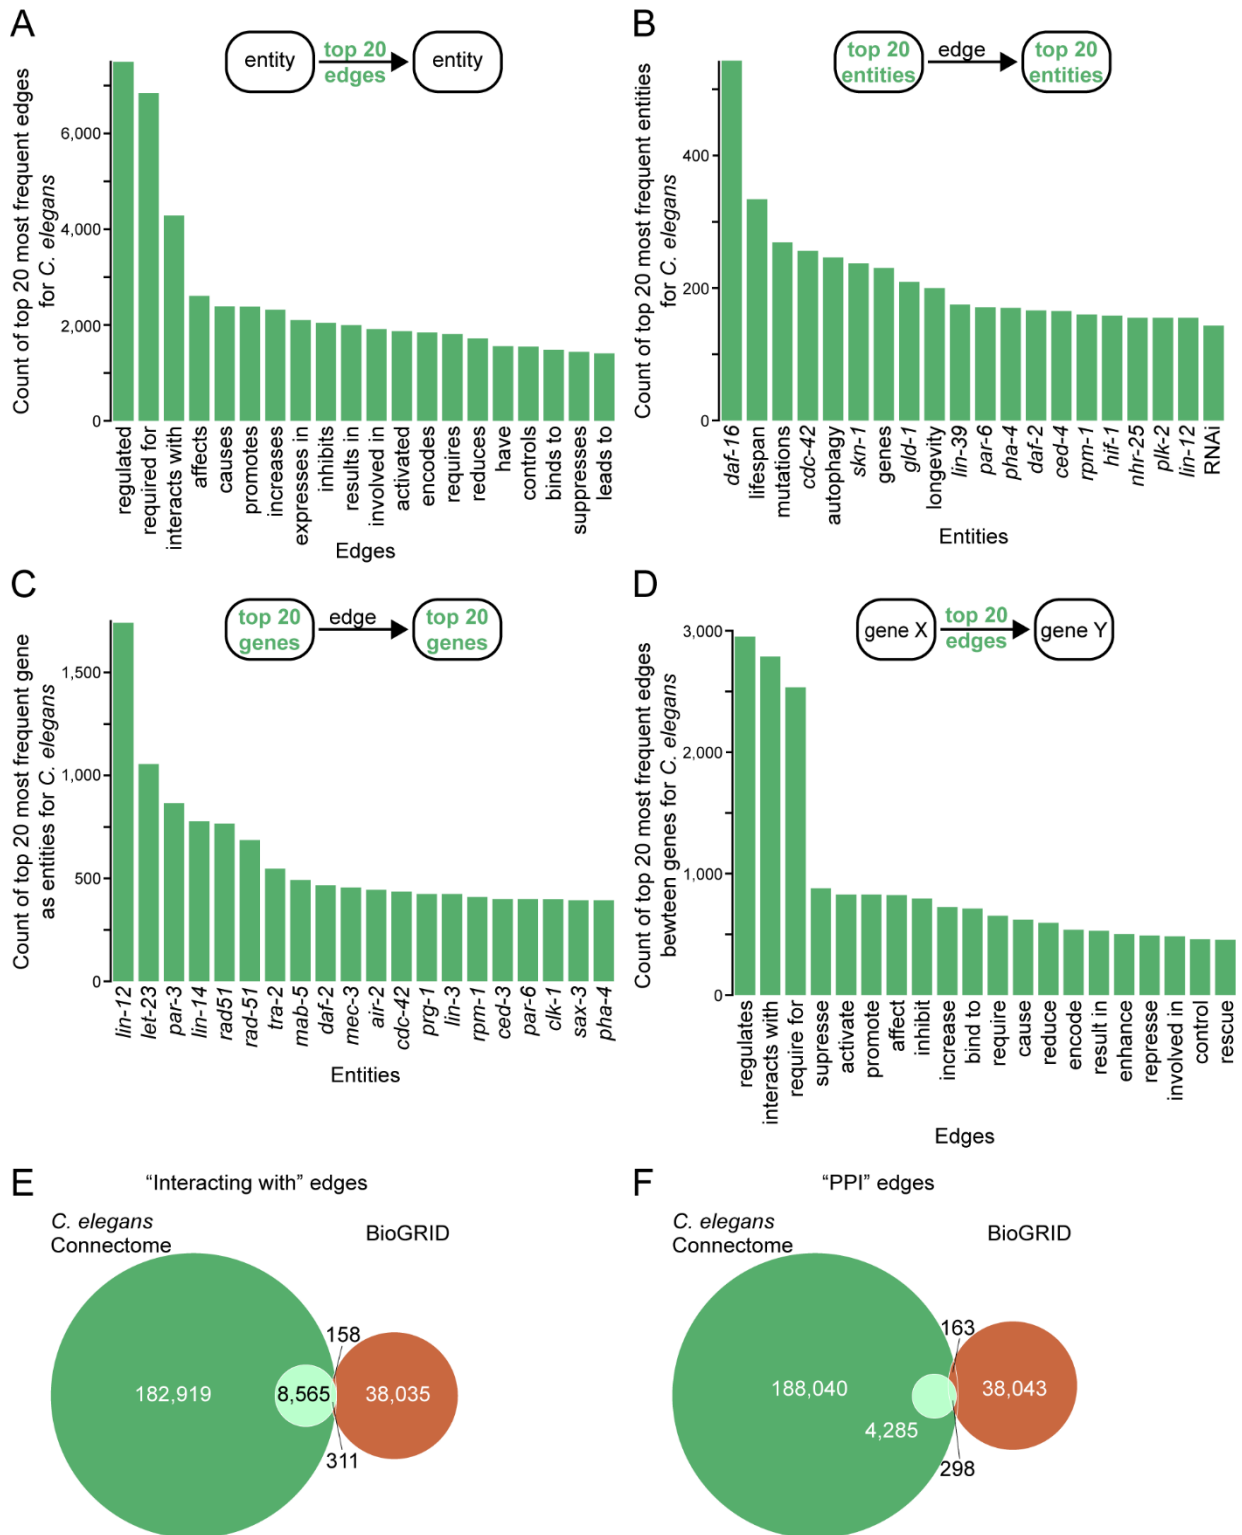

490  
491

492  
493  
494  
495  
496  
497  
498

**Figure 3. Network analysis highlights in *C. elegans* Connectome**

- (A) Frequency distribution of the top 20 interaction edges in the *C. elegans* connectome.  
 (B) Frequency distribution of the top 20 interaction entities in the *C. elegans* connectome.  
 (C) Frequency distribution of the top 20 interaction entities as genes in the *C. elegans* connectome.  
 (D) Frequency distribution of the top 20 interaction edges between genes in the *C. elegans* connectome.  
 (E-F) Venn diagram illustrating the commonalities "interacting with" (E) and protein-protein interaction (PPI) (F) edges in the *C. elegans* Connectome and the interacting proteins listed in BioGRID.

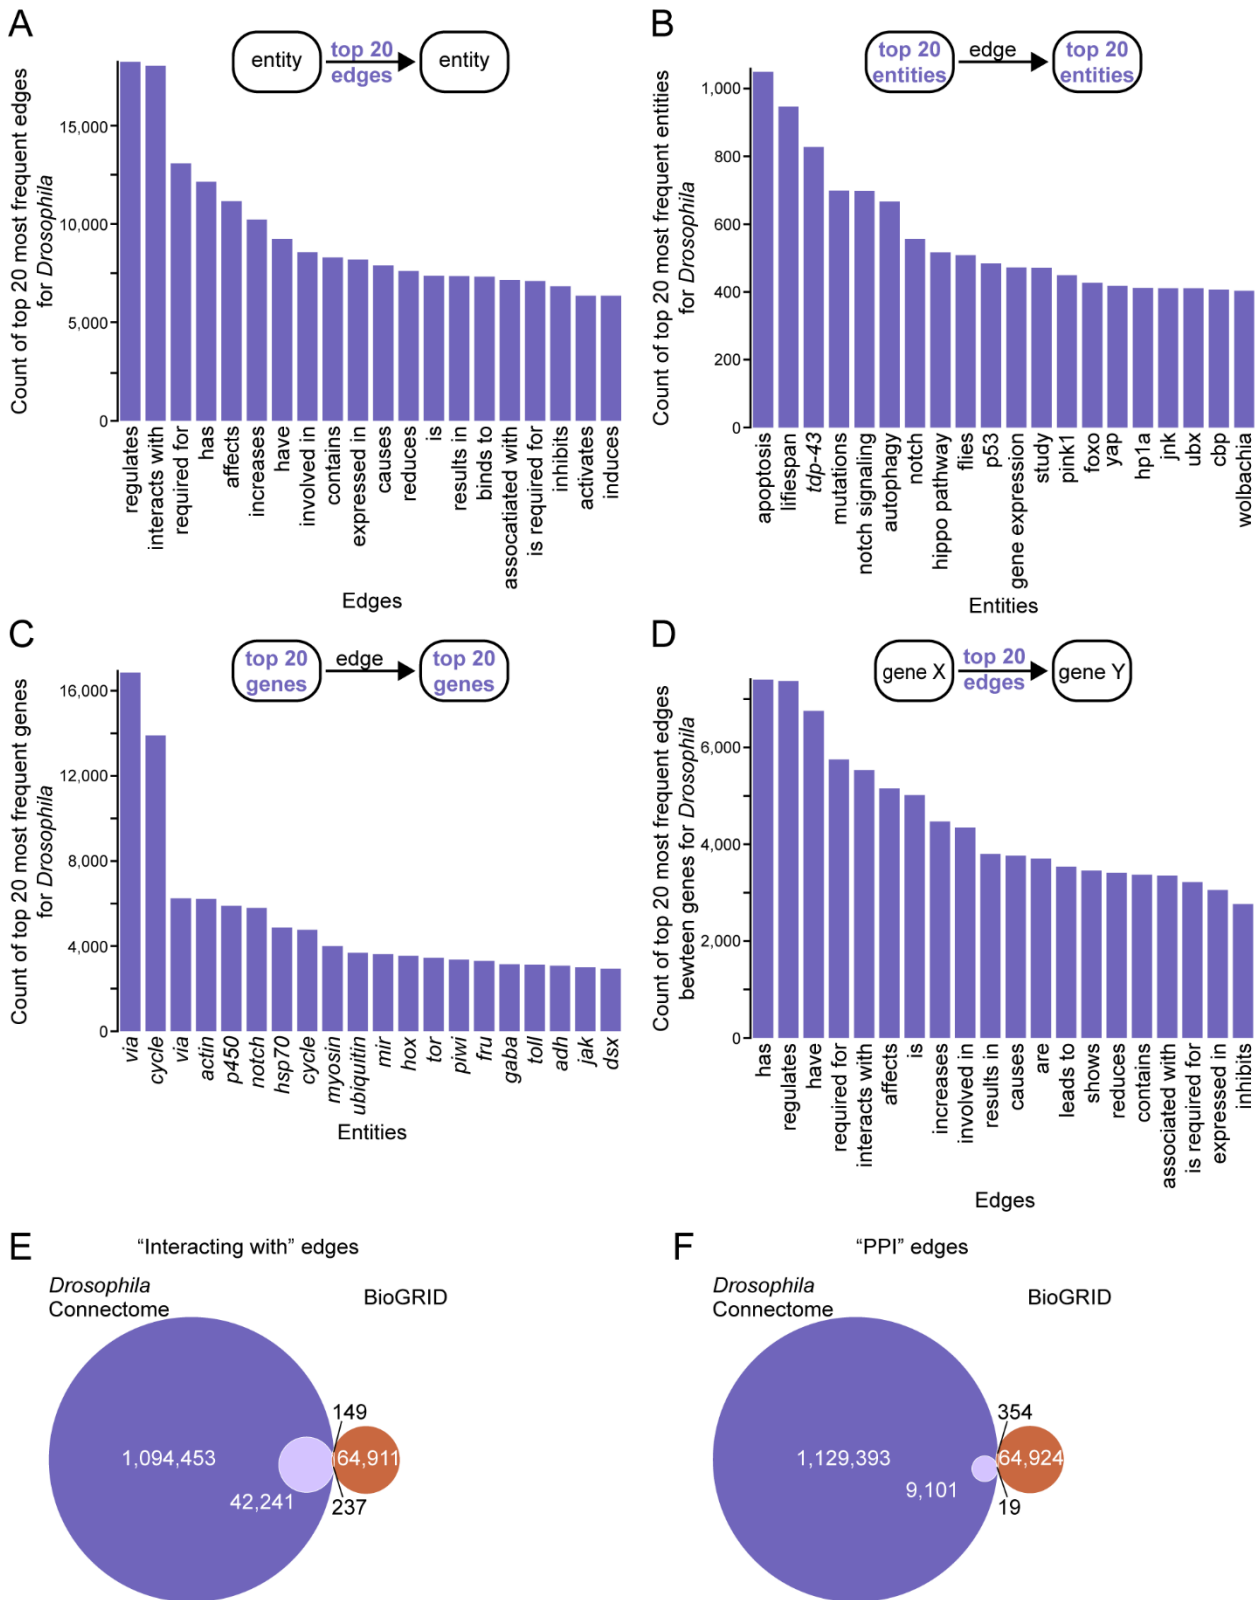

499  
500  
501  
502  
503  
504  
505  
506  
507

**Figure 4. Network analysis highlights in *Drosophila* connectome**

(A) Frequency distribution of the top 20 interaction edges in the *Drosophila* connectome.  
 (B) Frequency distribution of the top 20 interaction entities in the *Drosophila* connectome.  
 (C) Frequency distribution of the top 20 interaction entities as genes in the *Drosophila* connectome.  
 (D) Frequency distribution of the top 20 interaction edges between genes in the *Drosophila* connectome.  
 (E-F) Venn diagram illustrating the commonalities "interacting with" (E) and protein-protein interaction (PPI) (F) edges in the *Drosophila* Connectome and the interacting proteins listed in BioGRID.



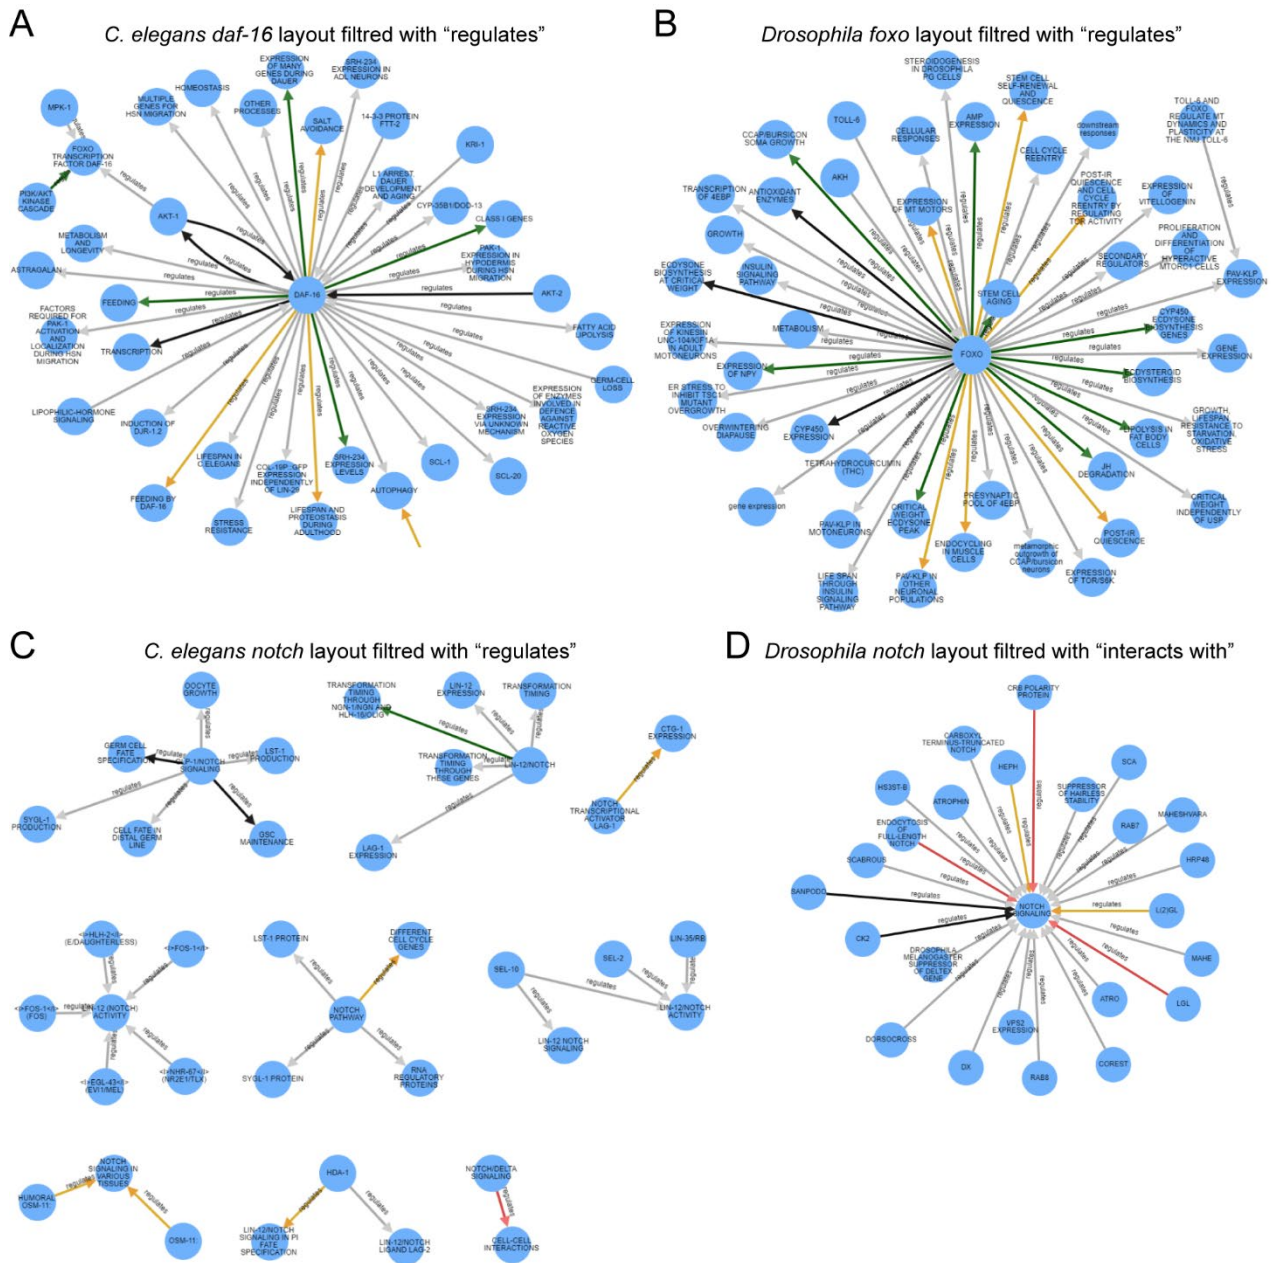

508  
509  
510  
511  
512  
513

**Figure 5. Connectome visualization for key genes in *C. elegans* and *Drosophila*.** (A) Knowledge network of *C. elegans* gene *daf-16* with Layout Options "regulates". (B) knowledge network of *Drosophila* gene *foxo* Layout Options "regulates". (C) Knowledge network of *C. elegans* "notch" genes with Layout Options "regulates". (D) Knowledge network of *Drosophila* gene *notch* with Layout Options "interacts with".



A

Journal names for *C. elegans*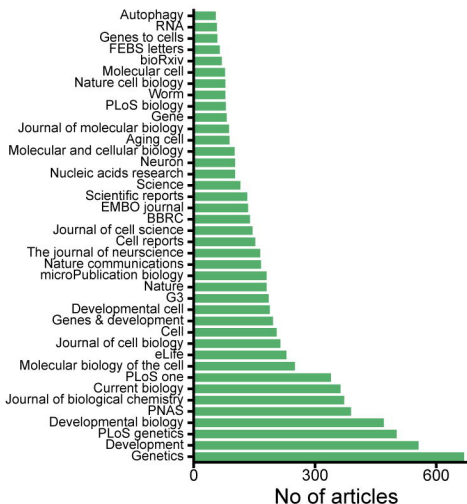

B

Journal names for *Drosophila*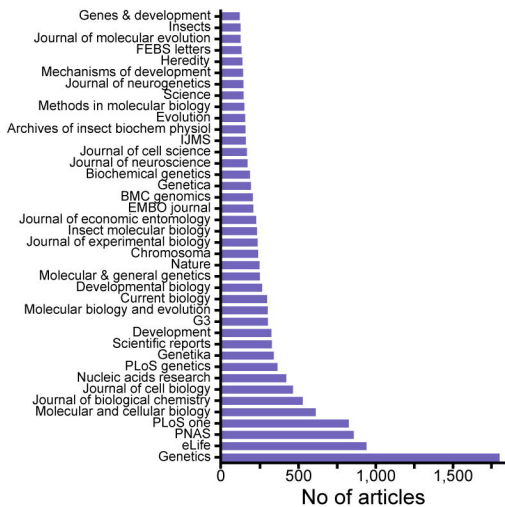

C

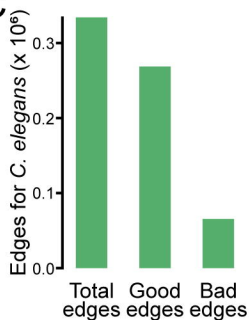

D

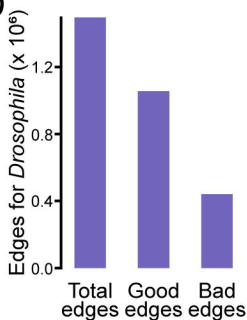

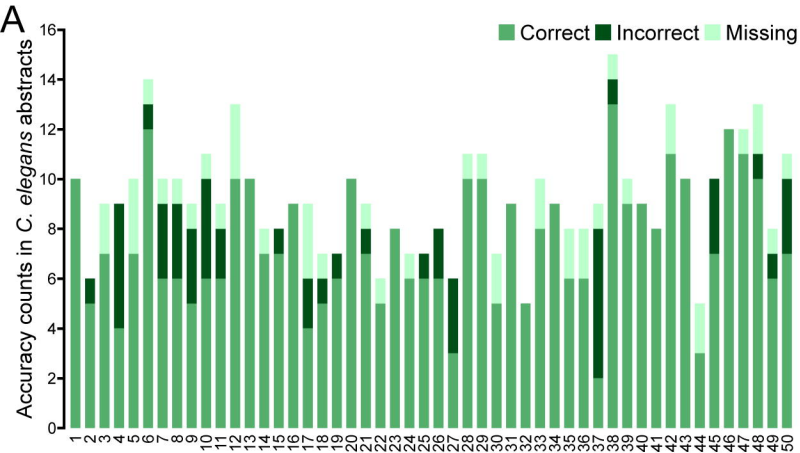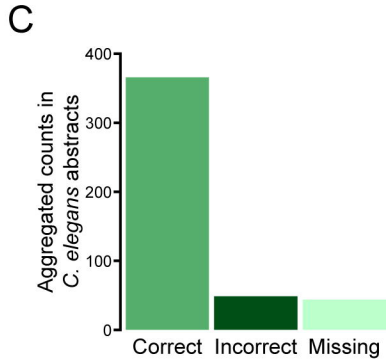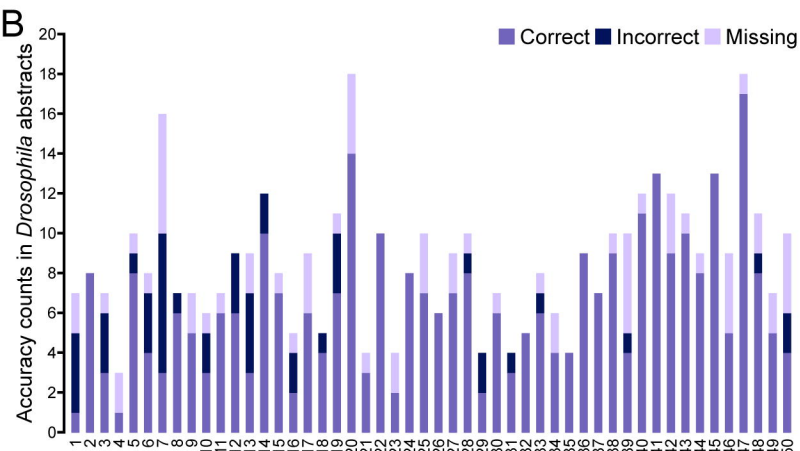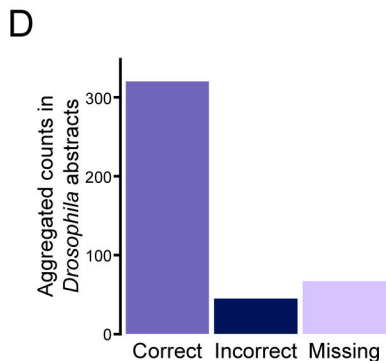

**A**Count of top 20 most frequent edges for *C. elegans*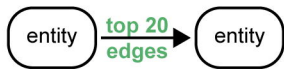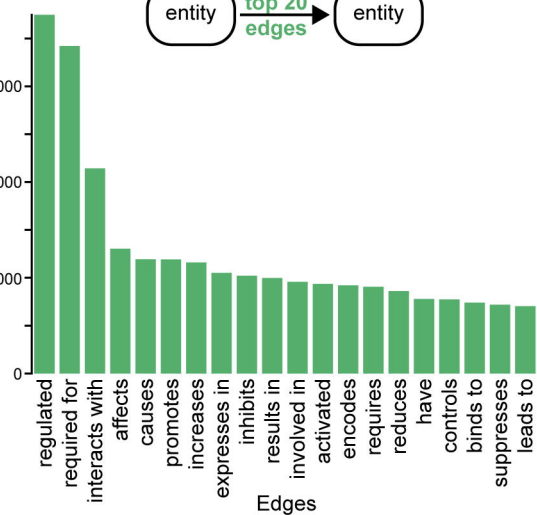**B**Count of top 20 most frequent entities for *C. elegans*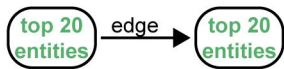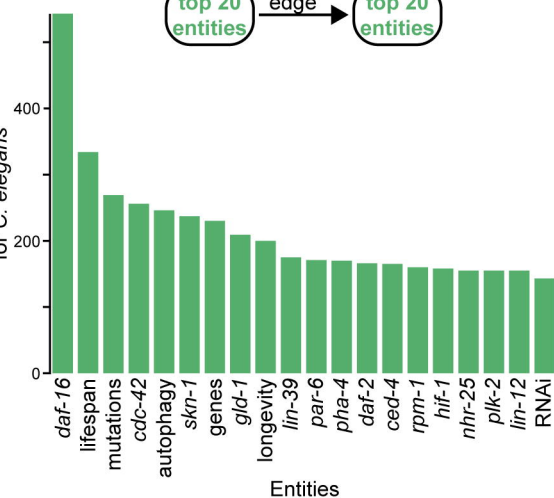**C**Count of top 20 most frequent gene as entities for *C. elegans*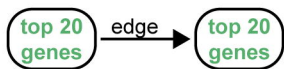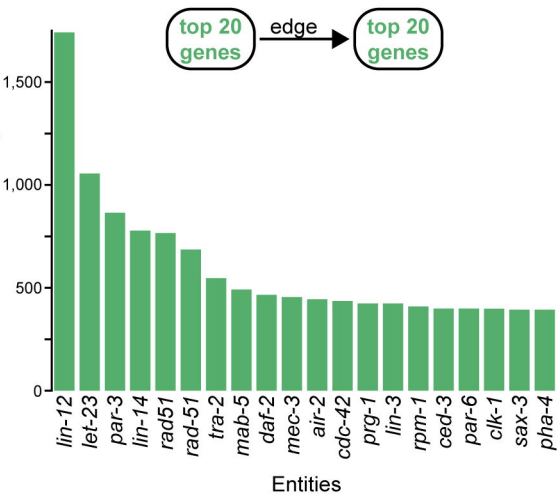**D**Count of top 20 most frequent edges between genes for *C. elegans*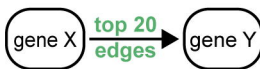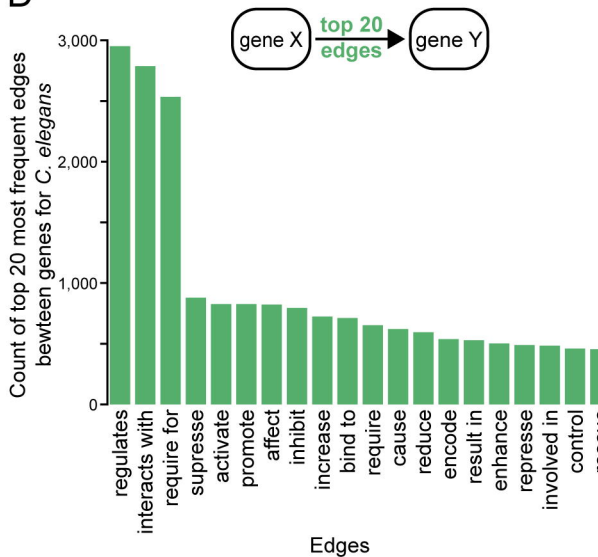**E**

"Interacting with" edges

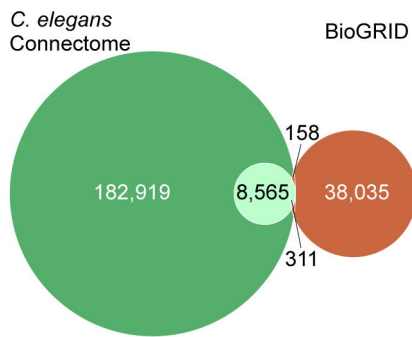**F**

"PPI" edges

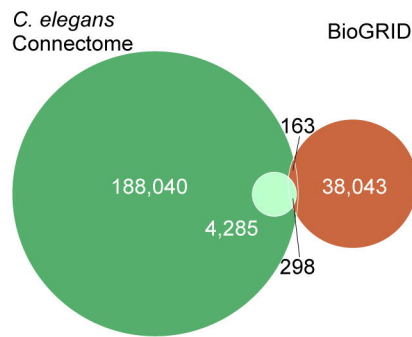

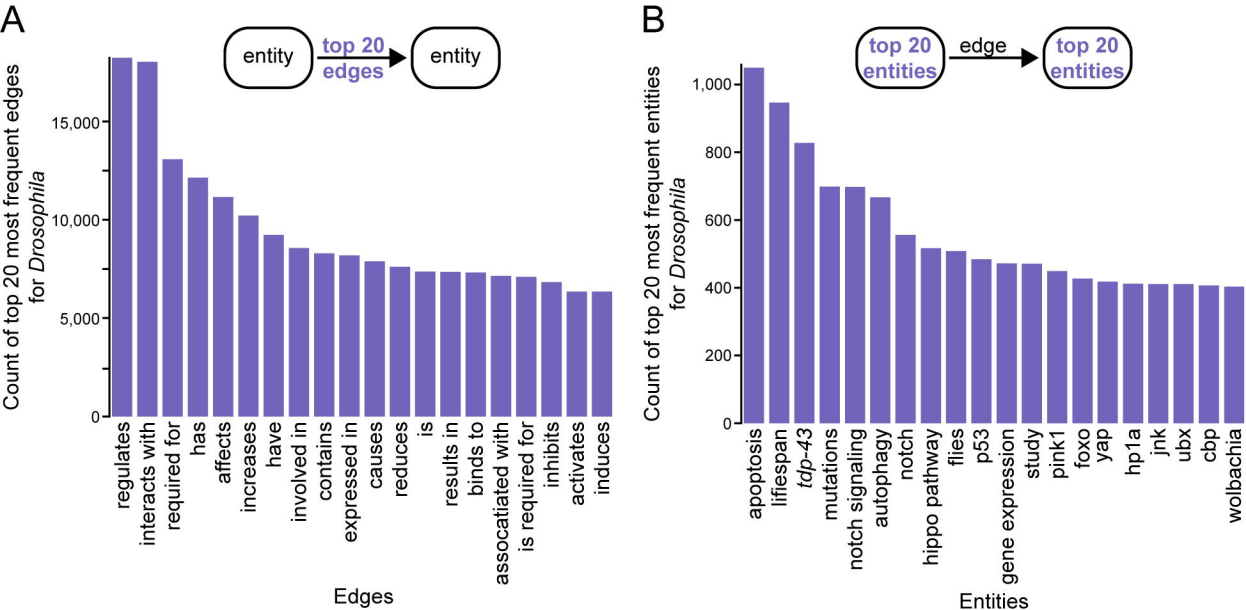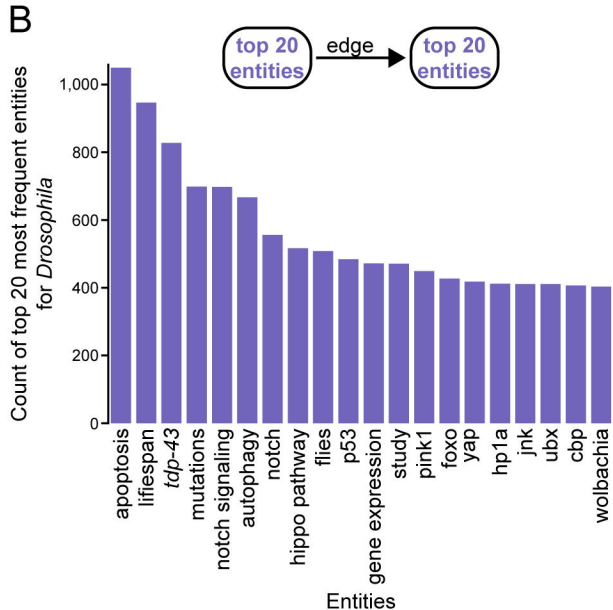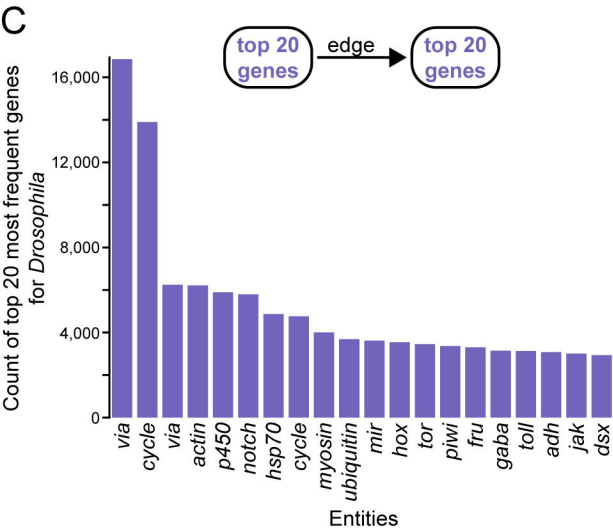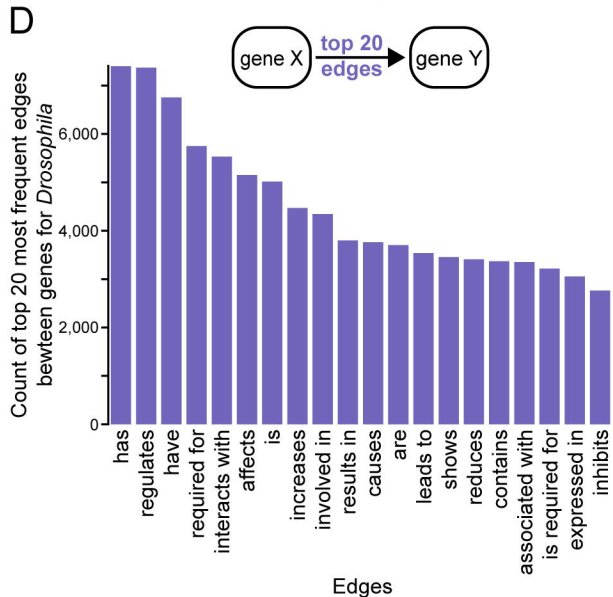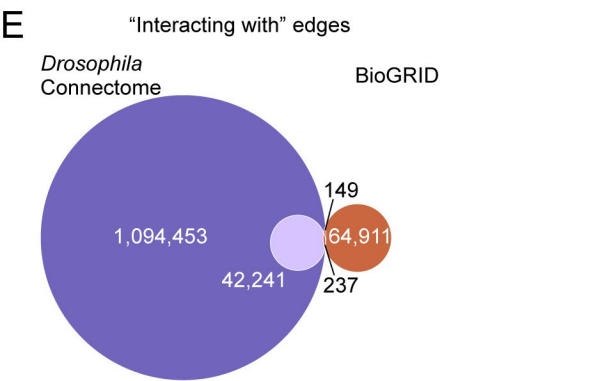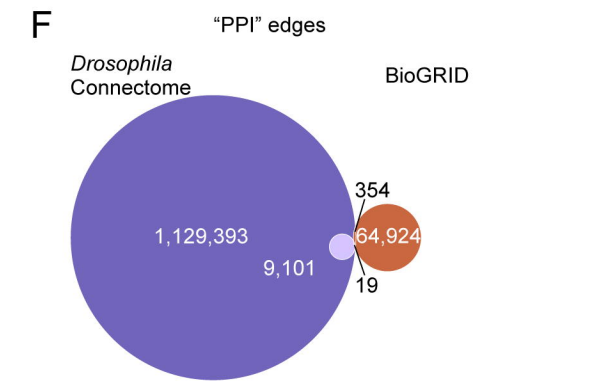

**A** *C. elegans* *daf-16* layout filtered with “regulates”

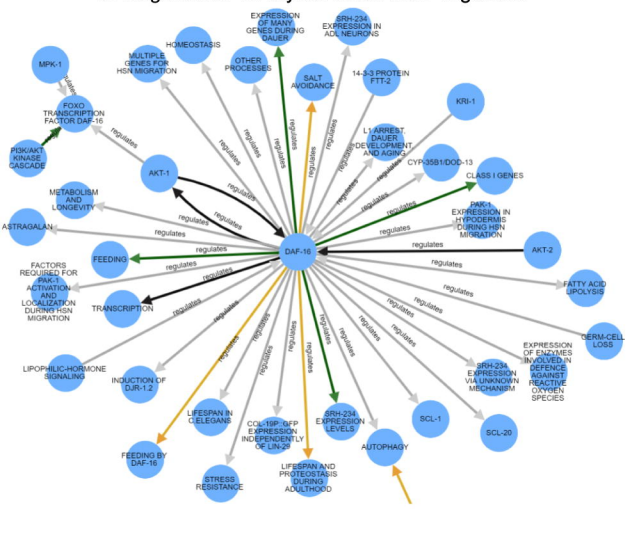

**B** *Drosophila* *foxo* layout filtered with “regulates”

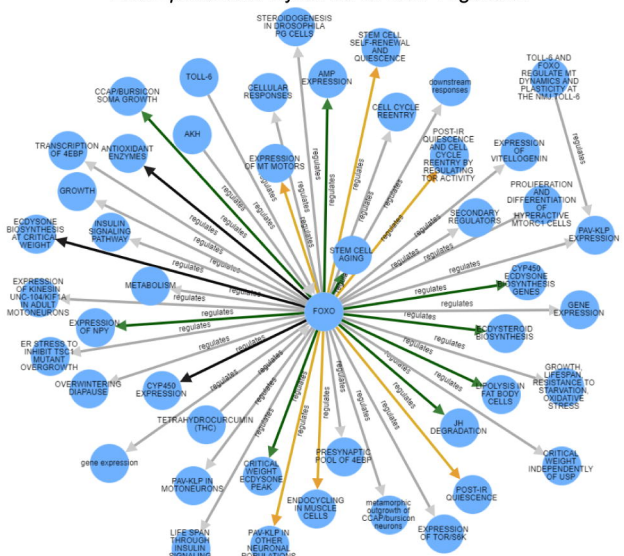

**C** *C. elegans* *notch* layout filtered with “regulates”

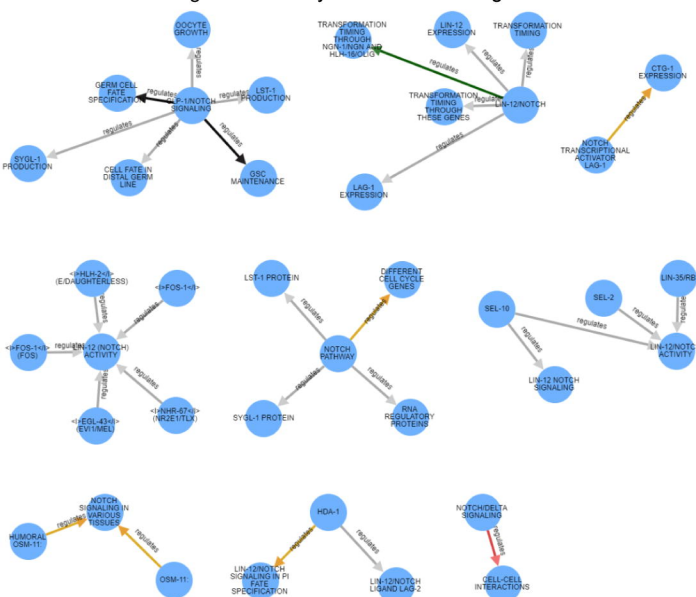

**D** *Drosophila* *notch* layout filtered with “interacts with”

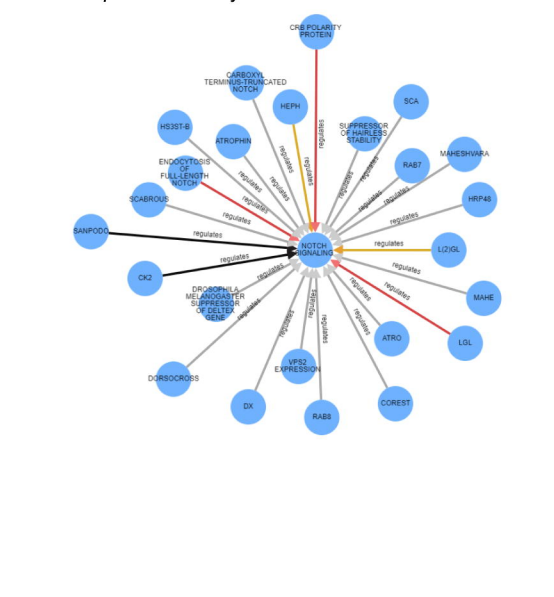

Source: https://www.biorxiv.org/content/10.1101/2024.04.13.588993v1.full.pdf
